# Supplementary material for: Identification of Abies sibirica L. Polyprenols and Characterisation of Polyprenol-Containing Liposomes
Source: MDPI journal article supplement (doi:10.3390/molecules25081801), 2020-04-14
Supplement: s1 [file s1]

## Supplement 1

As a reference of the studied polyprenol homologs below we provide high-resolution mass spectrometry (HRMS) peaks for *Abies sibirica* L. polyprenols.

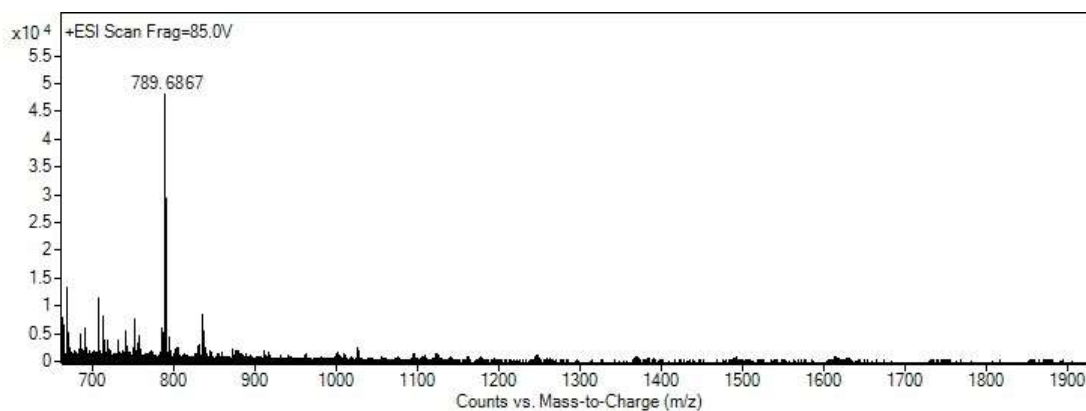

**Figure S1.** High-resolution mass spectra (HRMS) example of polyprenol homologue P11.

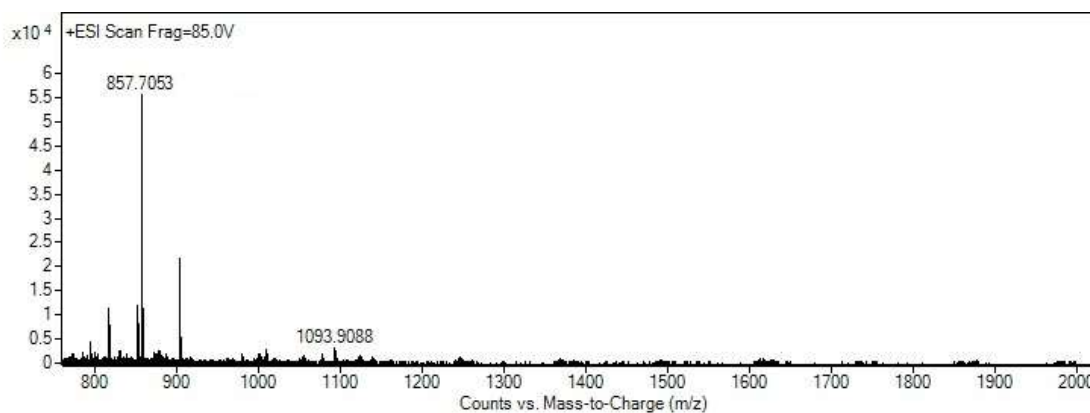

**Figure S2.** High-resolution mass spectra (HRMS) example of polyprenol homologue P12.

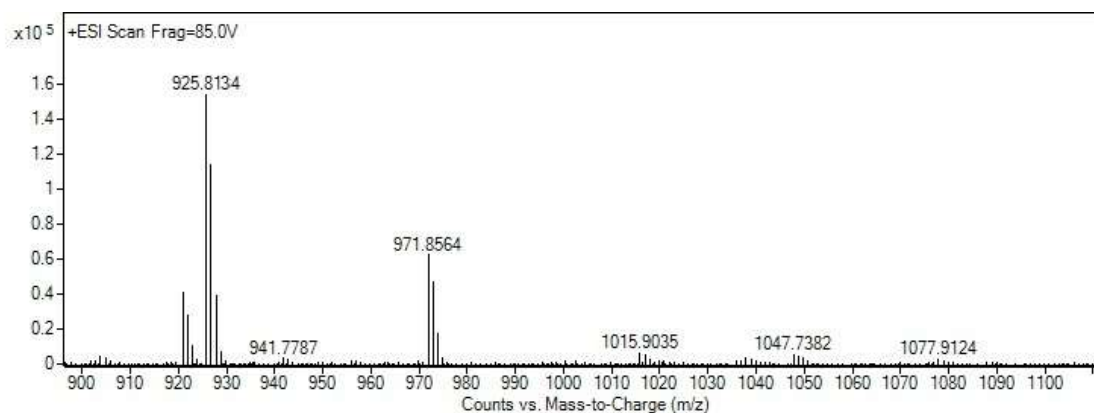

**Figure S3.** High-resolution mass spectra (HRMS) example of polyprenol homologue P13.

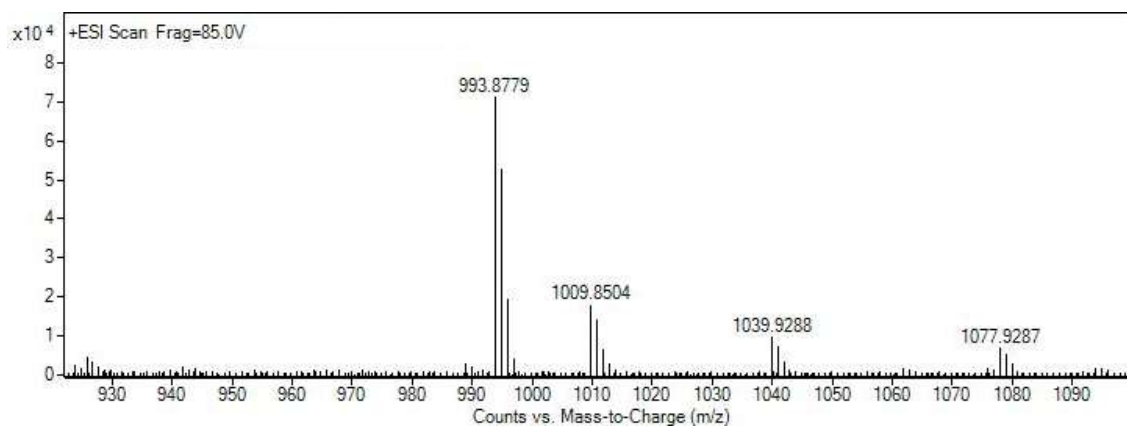

**Figure S4.** High-resolution mass spectra (HRMS) example of polyprenol homologue P14.

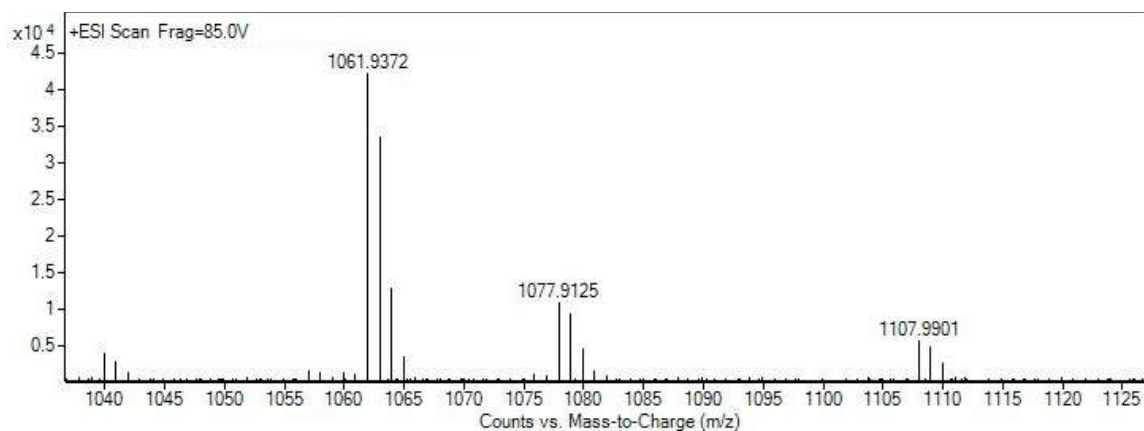

**Figure S5.** High-resolution mass spectra (HRMS) example of polyprenol homologue P15.

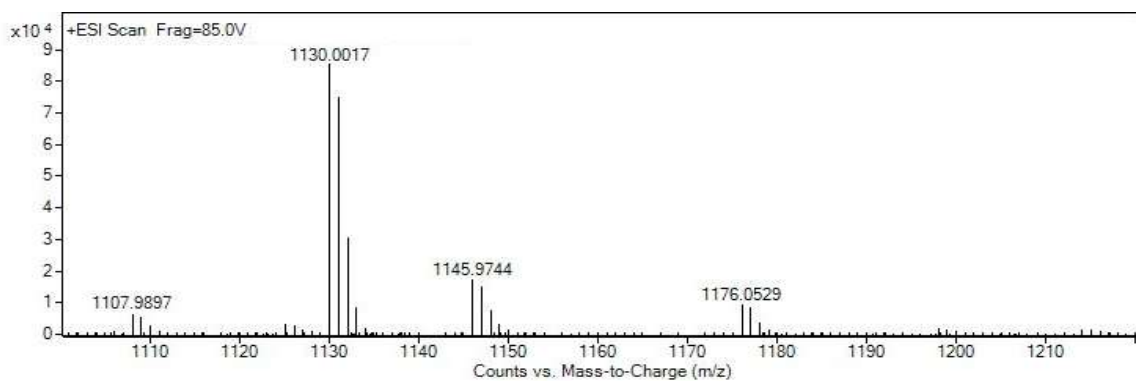

**Figure S6.** High-resolution mass spectra (HRMS) example of polyprenol homologue P16.

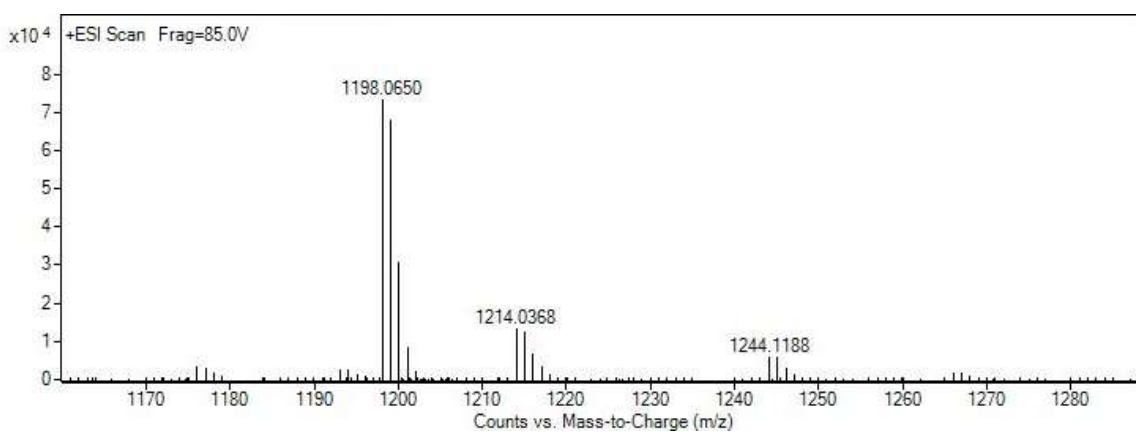

**Figure S7.** High-resolution mass spectra (HRMS) example of polyprenol homologue P17.

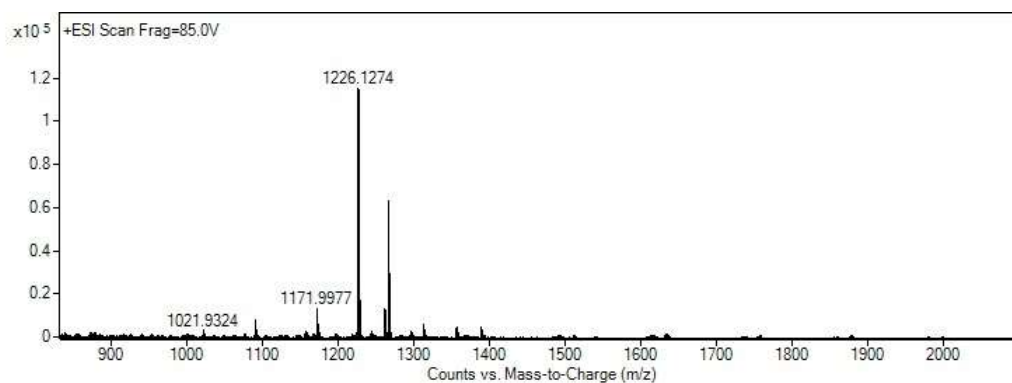

**Figure S8.** High-resolution mass spectra (HRMS) example of polyprenol homologue P18.

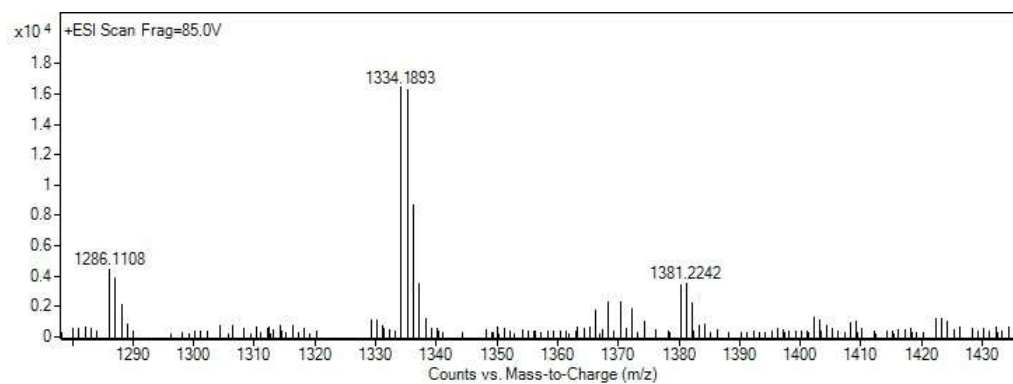

**Figure S9.** High-resolution mass spectra (HRMS) example of polyprenol homologue P19.

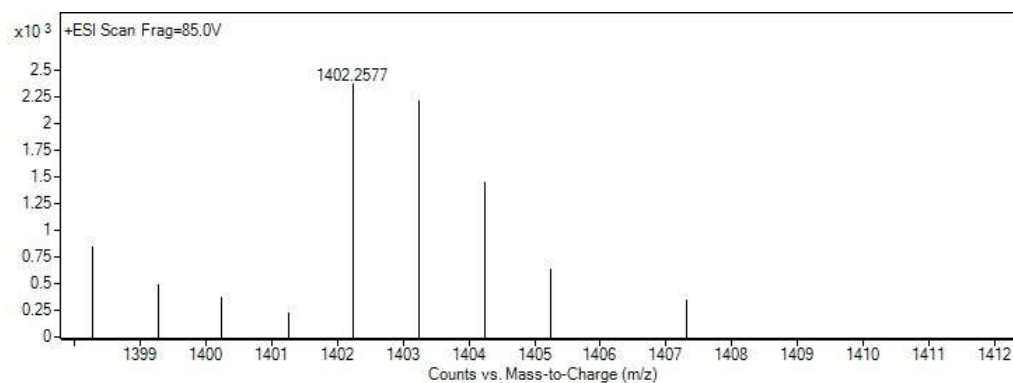

**Figure S10.** High-resolution mass spectra (HRMS) example of polyprenol homologue P20.
